# Supplementary material for: Urinary miR-16 transactivated by C/EBPβ reduces kidney function after ischemia/reperfusion–induced injury
Source: PubMed Central journal article supplement (PMC4906401; doi:10.1038/srep27945), 2016-06-14

## Urinary miR-16 transactivated by C/EBP $\beta$ reduces kidney function after ischemia/reperfusion-induced injury

Hsi-Hsien Chen, Yi-Fan Lan, Hsiao-Fen Li, Ching-Feng Cheng, Pei-Fang Lai, Wei-Hua Li, Heng Lin

**Supplemental Figure S1.** Potential transcriptional factors regulate pri-miR-16 transcriptional level. Quantitative RT-PCR analysis of pri-miR-16 level in 293 T cells after overexpression of NF-KB, PPAR $\alpha$  and ATF3 respectively.

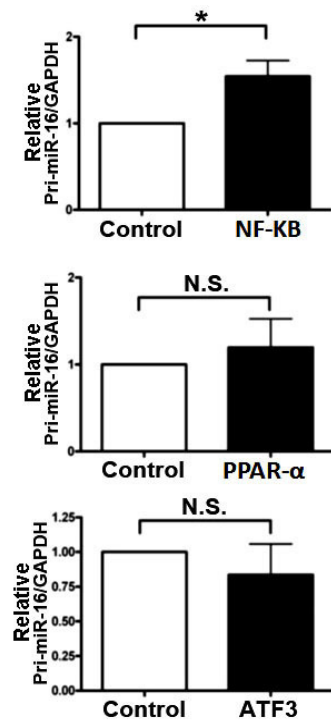

**Supplemental Figure S2.** Urinary miR-16 level stability assay. The double hybridization method to detect urinary miR-16 was applied to two AKI patients. The graph shows the fold-of-change of SPR response of two AKI patients (left Y axis).

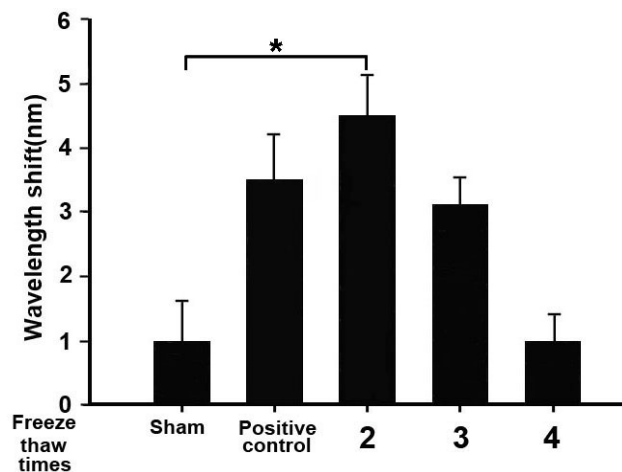

**Supplemental Figure 7D.** The full-length gels of Figure 7(D).

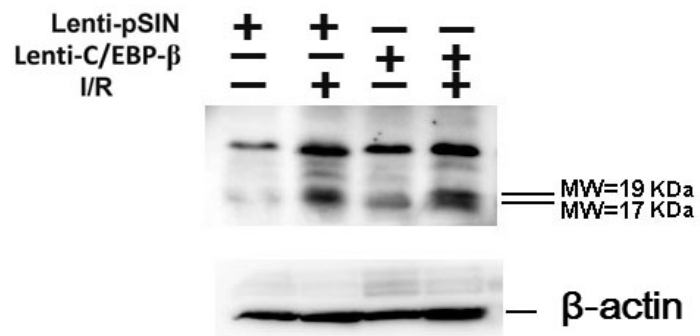

Supplement: srep27945-s1.pdf [file srep27945-s1.pdf]
